# Supplementary material
Source: Springer Nature journal article supplement (https://www.springermedizin.de/resource/supplementary/12889_2012_3870_MOESM1_ESM.pdf/9490778)
Supplement: MOESM1 [file 9490778]

The CAPICHe Trial  
Costs to Australian Private Insurance - Coaching Health

BUPA Fund members  
(~3 million)

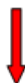

Meet inclusion / exclusion criteria

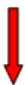

A proportion, dependent upon capacity of health coaches,  
are randomly selected using SurveySelect

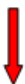

Standard demographic  
profiling

Randomisation  
[stratified for chronic condition and risk score]  
4:1 allocation ratio to intervention and control

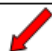

Usual Care

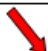

CAPICHe Intervention

- Mailed programme awareness

- Mailed programme awareness
- Mailed tailored educational material
- Mailed outreach to encourage the member to talk with health coach
- Outbound health coach outreach and follow up calls (min. 1 call first month)
- Access to inbound health coach call centre
- Mailed health coach material

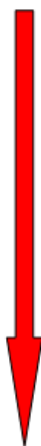

Minimum Follow-up 12 months  
[from randomisation into treatment group]

|                    |                                                                                                                                                                                             |
|--------------------|---------------------------------------------------------------------------------------------------------------------------------------------------------------------------------------------|
| Primary Outcome:   | Total (non-maternity) health care cost per member to the private health insurer                                                                                                             |
| Secondary Outcome: | Cost by type of service;<br>Hospitalisation rate;<br>"Impactable" hospitalisation rate;<br>Hospitalisation by type of service;<br>Same-day hospital admission rates;<br>Inpatient bed days. |
